# Supplementary material for: National and Regional Molecular Epidemiology of HIV-1 — China, 2004–2023
Source: PubMed Central journal article supplement — China CDC Wkly. 2024 Nov 29;6(48):1257–63. doi: 10.46234/ccdcw2024.252 (PMC11649986; doi:10.46234/ccdcw2024.252), 2024-11-29
Supplement: ccdcw-6-48-1257-S1.pdf [file ccdcw-6-48-1257-S1.pdf]

## SUPPLEMENTARY MATERIAL

SUPPLEMENTARY TABLE S1. Database Composition: Distribution of HIV-1 genetic variants across 2004–2009, 2010–2014, 2015–2019, and 2020–2023.

| Region/Years | HIV-1 CRFs |       |       |        |       | URF  | Total CRFs | Total recombinants | HIV-1 Subtypes |       | Total Subtypes | N      |
|--------------|------------|-------|-------|--------|-------|------|------------|--------------------|----------------|-------|----------------|--------|
|              | 01_AE      | 07_BC | 08_BC | 55_01B | Other |      |            |                    | B              | Other |                |        |
| China        |            |       |       |        |       |      |            |                    |                |       |                |        |
| 2004–2009    | 29.6%      | 22.3% | 5.2%  | 1.3%   | 3.5%  | 0.9% | 61.9%      | 62.8%              | 35.4%          | 1.8%  | 37.2%          | 9,488  |
| 2010–2014    | 44.7%      | 30.7% | 4.5%  | 4.5%   | 4.4%  | 0.9% | 88.8%      | 89.7%              | 9.2%           | 1.1%  | 10.3%          | 22,921 |
| 2015–2019    | 41.4%      | 34.1% | 6.7%  | 5.5%   | 4.7%  | 0.9% | 92.4%      | 93.2%              | 6.3%           | 0.5%  | 6.8%           | 43,480 |
| 2020–2023    | 29.2%      | 39.8% | 11.4% | 2.9%   | 9.2%  | 2.0% | 92.5%      | 94.5%              | 4.8%           | 0.7%  | 5.5%           | 18,587 |
| Central      |            |       |       |        |       |      |            |                    |                |       |                |        |
| 2004–2009    | 9.8%       | 1.5%  | 0.2%  | 0.0%   | 0.4%  | 0.1% | 12.0%      | 12.0%              | 87.8%          | 0.2%  | 88.0%          | 2,225  |
| 2010–2014    | 51.9%      | 21.7% | 2.4%  | 4.6%   | 2.8%  | 0.3% | 83.4%      | 83.7%              | 16.2%          | 0.1%  | 16.3%          | 711    |
| 2015–2019    | 36.0%      | 29.0% | 3.8%  | 5.6%   | 3.1%  | 1.0% | 77.5%      | 78.4%              | 21.1%          | 0.4%  | 21.6%          | 2,662  |
| 2020–2023    | 29.0%      | 37.2% | 3.9%  | 3.9%   | 7.1%  | 1.6% | 81.0%      | 82.6%              | 16.6%          | 0.7%  | 17.4%          | 2,269  |
| East         |            |       |       |        |       |      |            |                    |                |       |                |        |
| 2004–2009    | 35.3%      | 12.3% | 5.0%  | 0.0%   | 3.0%  | 0.6% | 55.6%      | 56.2%              | 41.3%          | 2.5%  | 43.8%          | 1,509  |
| 2010–2014    | 58.7%      | 25.6% | 0.9%  | 1.6%   | 4.4%  | 0.2% | 91.2%      | 91.4%              | 7.3%           | 1.3%  | 8.6%           | 2,475  |
| 2015–2019    | 41.5%      | 29.7% | 4.1%  | 3.8%   | 6.8%  | 1.2% | 85.8%      | 87.1%              | 12.4%          | 0.5%  | 12.9%          | 8,510  |
| 2020–2023    | 31.2%      | 40.0% | 6.5%  | 3.4%   | 10.5% | 2.6% | 91.7%      | 94.3%              | 4.7%           | 1.0%  | 5.7%           | 5,298  |
| North        |            |       |       |        |       |      |            |                    |                |       |                |        |
| 2004–2009    | 37.5%      | 15.7% | 3.2%  | 1.2%   | 1.7%  | 0.2% | 59.4%      | 59.6%              | 39.6%          | 0.8%  | 40.4%          | 997    |
| 2010–2014    | 50.7%      | 24.3% | 1.1%  | 1.1%   | 4.0%  | 0.3% | 81.2%      | 81.5%              | 17.9%          | 0.6%  | 18.5%          | 6,637  |
| 2015–2019    | 50.1%      | 30.3% | 0.9%  | 2.5%   | 6.4%  | 0.8% | 90.2%      | 90.9%              | 8.8%           | 0.3%  | 9.1%           | 5,536  |
| 2020–2023    | 37.7%      | 38.0% | 1.3%  | 2.5%   | 13.8% | 2.1% | 93.3%      | 95.4%              | 4.5%           | 0.1%  | 4.6%           | 1,734  |
| Northeast    |            |       |       |        |       |      |            |                    |                |       |                |        |
| 2004–2009    | 66.9%      | 4.3%  | 1.8%  | 0.6%   | 8.0%  | 0.0% | 81.6%      | 81.6%              | 17.2%          | 1.2%  | 18.4%          | 163    |
| 2010–2014    | 77.7%      | 6.7%  | 0.0%  | 0.3%   | 6.1%  | 1.1% | 90.8%      | 91.9%              | 7.0%           | 1.1%  | 8.1%           | 358    |
| 2015–2019    | 72.2%      | 16.6% | 0.4%  | 0.8%   | 4.0%  | 0.2% | 94.0%      | 94.2%              | 5.5%           | 0.3%  | 5.8%           | 1,264  |
| 2020–2023    | 51.3%      | 29.6% | 0.6%  | 1.6%   | 8.8%  | 1.9% | 92.0%      | 93.9%              | 5.3%           | 0.8%  | 6.1%           | 622    |
| Northwest    |            |       |       |        |       |      |            |                    |                |       |                |        |
| 2004–2009    | 4.0%       | 85.1% | 0.3%  | 0.0%   | 0.0%  | 0.0% | 89.4%      | 89.4%              | 10.4%          | 0.2%  | 10.6%          | 597    |
| 2010–2014    | 21.4%      | 71.3% | 0.2%  | 0.3%   | 1.1%  | 0.3% | 94.2%      | 94.5%              | 5.5%           | 0.0%  | 5.5%           | 637    |
| 2015–2019    | 18.4%      | 69.1% | 0.8%  | 2.4%   | 4.1%  | 0.8% | 94.8%      | 95.6%              | 4.1%           | 0.3%  | 4.4%           | 1,109  |
| 2020–2023    | 10.5%      | 70.9% | 1.5%  | 1.6%   | 9.9%  | 3.0% | 94.5%      | 97.5%              | 2.0%           | 0.5%  | 2.5%           | 910    |
| South        |            |       |       |        |       |      |            |                    |                |       |                |        |
| 2004–2009    | 53.5%      | 21.9% | 5.6%  | 4.7%   | 3.7%  | 0.4% | 89.5%      | 89.8%              | 8.1%           | 2.1%  | 10.2%          | 2,220  |
| 2010–2014    | 43.5%      | 34.2% | 3.8%  | 9.5%   | 2.9%  | 0.4% | 93.9%      | 94.3%              | 5.1%           | 0.6%  | 5.7%           | 8,893  |
| 2015–2019    | 49.5%      | 28.3% | 6.9%  | 9.3%   | 3.1%  | 0.4% | 97.1%      | 97.5%              | 2.3%           | 0.2%  | 2.5%           | 17,808 |
| 2020–2023    | 39.3%      | 33.3% | 8.8%  | 6.0%   | 7.8%  | 2.0% | 95.1%      | 97.1%              | 2.6%           | 0.3%  | 2.9%           | 2,490  |
| Southwest    |            |       |       |        |       |      |            |                    |                |       |                |        |
| 2004–2009    | 20.1%      | 41.6% | 14.3% | 0.1%   | 9.4%  | 3.9% | 85.5%      | 89.4%              | 6.5%           | 4.1%  | 10.6%          | 1,777  |
| 2010–2014    | 24.0%      | 34.9% | 18.3% | 1.0%   | 10.6% | 4.0% | 88.8%      | 92.7%              | 3.6%           | 3.6%  | 7.3%           | 3,210  |
| 2015–2019    | 12.7%      | 58.2% | 17.7% | 1.0%   | 5.7%  | 1.6% | 95.3%      | 96.9%              | 1.3%           | 1.8%  | 3.1%           | 6,591  |
| 2020–2023    | 20.1%      | 40.3% | 27.2% | 0.9%   | 8.0%  | 1.2% | 96.6%      | 97.8%              | 1.3%           | 0.9%  | 2.2%           | 5,264  |
